# Supplementary material
Source: Springer Nature journal article supplement (https://www.springermedizin.de/resource/supplementary/12963_2009_75_MOESM1_ESM.pdf/9572636)
Supplement: MOESM1 [file 9572636]

| category                        | indicator               | % positive responses | % observed agreement | % expected agreement | $\kappa$ | p for observed > expected |
|---------------------------------|-------------------------|----------------------|----------------------|----------------------|----------|---------------------------|
| background                      | married                 | 91.8                 | 85.7                 | 84.6                 | 0.074    | 0.209                     |
|                                 | 20-34 yrs at death      | 51.1                 | 63.7                 | 49.7                 | 0.104    | 0.004                     |
|                                 | under 20 yrs at death   | 13.7                 | 83.5                 | 76.2                 | 0.309    | 0.001                     |
|                                 | died in wet season      | 30.2                 | 76.9                 | 57.7                 | 0.455    | 0.000                     |
|                                 | 35+ years at death      | 35.2                 | 75.8                 | 54.4                 | 0.470    | 0.000                     |
| pregnancy status                | had ever been pregnant  | 56.0                 | 14.3                 | 14.0                 | 0.003    | 0.348                     |
|                                 | early pregnancy ended   | 6.6                  | 89.0                 | 87.6                 | 0.115    | 0.121                     |
|                                 | not pregnant at death   | 24.2                 | 71.4                 | 60.9                 | 0.269    | 0.001                     |
|                                 | pregnant at death       | 20.9                 | 78.0                 | 67.0                 | 0.335    | 0.001                     |
|                                 | breast feeding at death | 24.2                 | 80.2                 | 63.3                 | 0.461    | 0.000                     |
|                                 | delivered within 6 wks  | 47.3                 | 73.6                 | 49.3                 | 0.480    | 0.000                     |
|                                 | first pregnancy         | 14.8                 | 87.9                 | 74.4                 | 0.527    | 0.000                     |
|                                 | > 4 pregnancies         | 44.0                 | 78.0                 | 50.1                 | 0.559    | 0.000                     |
| clinical history                | HIV/AIDS diagnosis      | 3.3                  | 93.4                 | 93.6                 | -0.030   | 0.620                     |
|                                 | suspected suicide       | 1.6                  | 96.7                 | 96.8                 | -0.015   | 0.560                     |
|                                 | recent injury           | 1.6                  | 96.7                 | 96.8                 | -0.015   | 0.560                     |
|                                 | malaria diagnosis       | 17.6                 | 71.4                 | 71.0                 | 0.015    | 0.443                     |
|                                 | liver disease diagnosis | 9.3                  | 81.3                 | 82.0                 | 0.040    | 0.737                     |
|                                 | CVD diagnosis           | 12.1                 | 80.2                 | 78.4                 | 0.086    | 0.185                     |
|                                 | had a previous C-sect   | 2.7                  | 96.7                 | 94.6                 | 0.389    | 0.000                     |
|                                 | TB diagnosis            | 2.2                  | 97.8                 | 95.7                 | 0.491    | 0.000                     |
|                                 | malignancy diagnosis    | 1.1                  | 100.0                | 97.8                 | 1.000    | 0.000                     |
| signs and symptoms before death | persistent fever        | 15.9                 | 70.3                 | 72.7                 | -0.088   | 0.815                     |
|                                 | blurred vision          | 25.8                 | 59.3                 | 61.4                 | -0.053   | 0.698                     |
|                                 | breathless              | 53.8                 | 40.7                 | 42.5                 | -0.032   | 0.661                     |
|                                 | pallor or anaemia       | 39.6                 | 51.7                 | 51.8                 | -0.003   | 0.512                     |
|                                 | acute fever             | 24.7                 | 57.1                 | 56.9                 | 0.004    | 0.476                     |
|                                 | swollen body            | 10.4                 | 81.3                 | 81.0                 | 0.017    | 0.432                     |
|                                 | abdominal pain          | 24.2                 | 64.8                 | 63.2                 | 0.043    | 0.339                     |
|                                 | collapse                | 31.9                 | 53.9                 | 56.5                 | 0.061    | 0.719                     |
|                                 | in bed during day       | 27.5                 | 62.6                 | 60.1                 | 0.063    | 0.274                     |
|                                 | jaundice                | 20.3                 | 70.3                 | 67.1                 | 0.098    | 0.164                     |
|                                 | fever with shivering    | 25.3                 | 64.8                 | 59.3                 | 0.136    | 0.054                     |
|                                 | night sweats            | 39.0                 | 61.5                 | 52.3                 | 0.193    | 0.033                     |
|                                 | recurrent fever         | 25.3                 | 69.2                 | 61.8                 | 0.194    | 0.029                     |
|                                 | coma >24h               | 16.5                 | 78.0                 | 72.3                 | 0.208    | 0.021                     |
|                                 | foul-smelling discharge | 4.4                  | 93.4                 | 91.6                 | 0.216    | 0.020                     |
|                                 | stiff neck              | 11.0                 | 84.6                 | 80.3                 | 0.217    | 0.017                     |
|                                 | swollen feet            | 20.3                 | 74.7                 | 67.6                 | 0.220    | 0.018                     |
|                                 | swollen glands          | 4.4                  | 93.4                 | 91.5                 | 0.224    | 0.006                     |
|                                 | weight loss             | 41.8                 | 62.6                 | 50.5                 | 0.245    | 0.008                     |
|                                 | swollen face            | 12.6                 | 83.5                 | 77.6                 | 0.263    | 0.004                     |
| persistent cough                | 12.6                    | 85.7                 | 77.9                 | 0.355                | 0.000    |                           |

|                     |                                       |      |       |      |        |       |
|---------------------|---------------------------------------|------|-------|------|--------|-------|
|                     | coughing blood                        | 2.7  | 96.7  | 94.7 | 0.384  | 0.000 |
|                     | transfusion needed                    | 30.2 | 81.3  | 57.8 | 0.557  | 0.000 |
|                     | ever had fits                         | 12.1 | 91.2  | 78.4 | 0.594  | 0.000 |
| obstetric<br>record | unwanted pregnancy                    | 23.1 | 56.0  | 59.6 | -0.074 | 0.882 |
|                     | died in labour                        | 6.0  | 87.9  | 88.5 | -0.050 | 0.708 |
|                     | abnormal baby position                | 12.1 | 78.0  | 78.7 | -0.033 | 0.624 |
|                     | assisted delivery                     | 3.8  | 92.3  | 92.5 | -0.019 | 0.605 |
|                     | baby part prolapsed                   | 2.2  | 95.6  | 95.7 | -0.017 | 0.573 |
|                     | hysterectomy                          | 1.6  | 96.7  | 96.8 | -0.015 | 0.560 |
|                     | big baby                              | 11.5 | 79.1  | 78.9 | 0.013  | 0.442 |
|                     | fits during pregnancy                 | 14.8 | 74.7  | 74.2 | 0.019  | 0.423 |
|                     | BP raised in pregnancy                | 11.0 | 82.4  | 80.1 | 0.119  | 0.104 |
|                     | first trimester death                 | 6.0  | 90.1  | 88.5 | 0.141  | 0.063 |
|                     | labour >24h                           | 8.8  | 86.8  | 83.9 | 0.183  | 0.035 |
|                     | bleeding at delivery                  | 25.3 | 69.2  | 61.8 | 0.194  | 0.029 |
|                     | bleeding in 1 <sup>st</sup> trimester | 7.1  | 90.1  | 86.7 | 0.255  | 0.007 |
|                     | delivered at home                     | 20.9 | 78.0  | 66.9 | 0.337  | 0.001 |
|                     | attempted termination                 | 2.7  | 96.7  | 94.6 | 0.389  | 0.000 |
|                     | delivered in a facility               | 33.0 | 78.0  | 55.7 | 0.504  | 0.000 |
|                     | professional care at del              | 31.3 | 81.3  | 56.9 | 0.563  | 0.000 |
|                     | death within 24h of del               | 23.6 | 85.7  | 63.9 | 0.605  | 0.000 |
|                     | multiple pregnancy                    | 3.3  | 97.8  | 93.6 | 0.657  | 0.000 |
|                     | placenta retained                     | 6.0  | 96.7  | 88.6 | 0.710  | 0.000 |
|                     | baby delivered alive                  | 36.3 | 86.8  | 53.8 | 0.715  | 0.000 |
|                     | delivered by C-section                | 5.5  | 100.0 | 89.6 | 1.000  | 0.000 |
